# Supplementary material for: Carbon dioxide absorption by hydroxyalkyl amidines impregnated into mesoporous silica: the effect of pore morphology and absorbent loading
Source: Royal Society of Chemistry journal article supplement (doi:10.1039/c3ra45063e), 2013-11-11
Supplement: c3ra45063e.pdf [file c3ra45063e.pdf]

## Supplementary Information

# Carbon Dioxide Absorption by Hydroxyalkyl Amidines Impregnated into Mesoporous Silica: The Effect of Pore Morphology and Absorbent Loading

Seonhui Lee, Su-Young Moon, Hyungsoo Kim, Jae-Sung Bae, Eunkyung Jeon, Hee-Young Ahn, and Ji-Woong Park\*

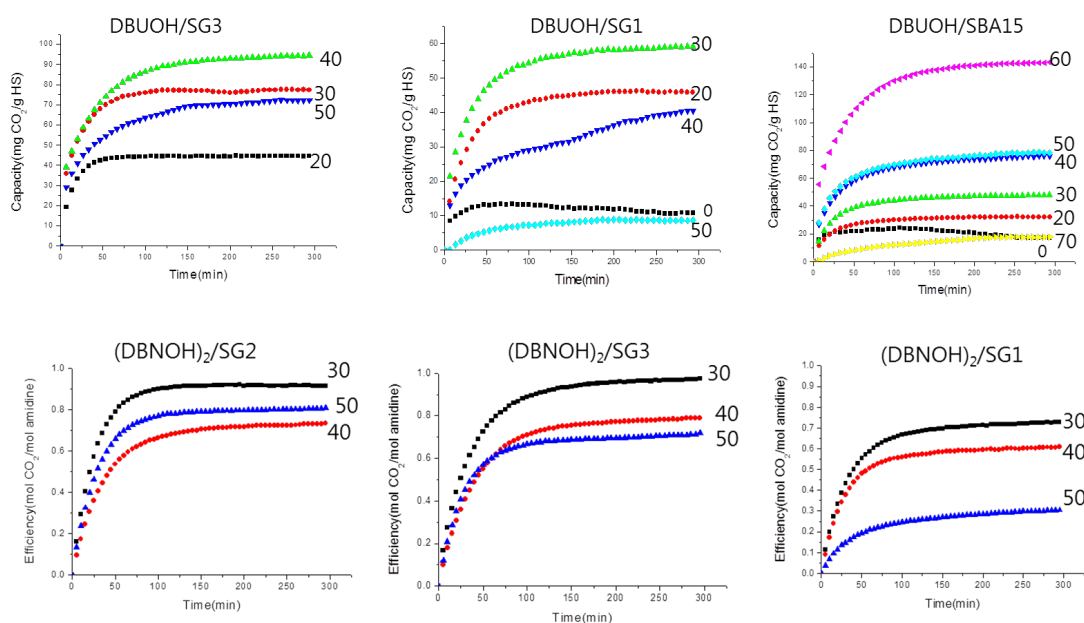

**Fig. 1S.** Isothermal TGA curves of DBUOH in SG3, SG1, and SBA15, respectively, and (DBNOH)<sub>2</sub> in SG2, SG3, and SG1, respectively, measured at 25°C under CO<sub>2</sub> flow of 20 mL/min. The number next to each curve is the amount of HAM in wt %.

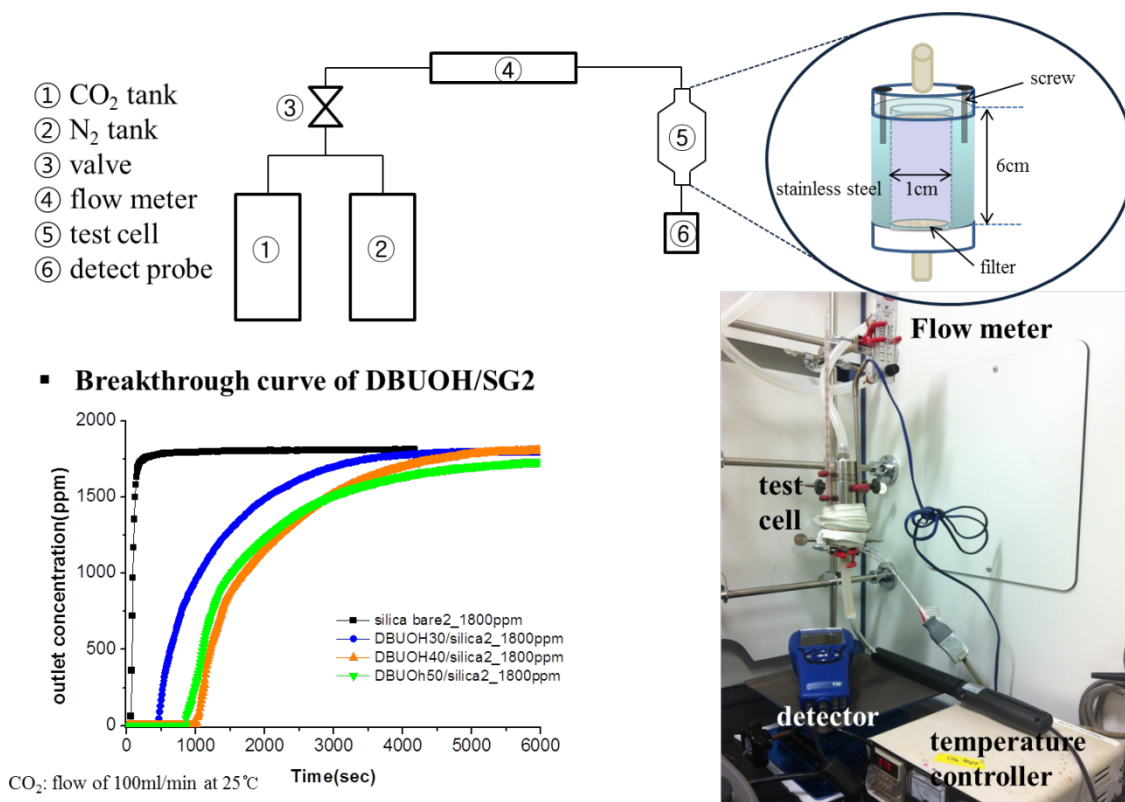

**Fig. 2S.** A breakthrough test kit with DBUOH/SG2 and breakthrough curves obtained by flowing a mixed gas with 1800 ppm CO<sub>2</sub> in N<sub>2</sub>.
